# Supplementary material for: Diagnostic accuracy of urinary antigen tests for pneumococcal pneumonia among patients with acute respiratory failure suspected pneumonia: a systematic review and meta-analysis
Source: HighWire-hosted journal article supplement (doi:10.1136/bmjopen-2021-057216), 2022-08-01
Supplement: bmjopen-2021-057216supp002_data_supplement.pdf [file bmjopen-2021-057216supp002_data_supplement.pdf]

**Supplementary file 1.** The details of the search strategy

Search by PubMed performed on June 3, 2020

|     | Search terms                                 | Number    |
|-----|----------------------------------------------|-----------|
| #1  | pneumococcal infections[mh]                  | 20,513    |
| #2  | "Pneumonia, Pneumococcal"[mh]                | 5,098     |
| #3  | streptococcus pneumonia* [tiab]              | 24,663    |
| #4  | #1 OR #2 OR #3                               | 36,152    |
| #5  | "Antigens"[Mesh]                             | 1,047,961 |
| #6  | antigen[tiab]                                | 452,063   |
| #7  | #5 OR #6                                     | 1,241,294 |
| #8  | urine[mh]                                    | 37,170    |
| #9  | urin*[tiab]                                  | 487,503   |
| #10 | #8 OR #9                                     | 495,249   |
| #11 | #7 AND #10                                   | 18,163    |
| #12 | "Sputum"[Mesh]                               | 21,271    |
| #13 | "Blood Culture"[Mesh]                        | 859       |
| #14 | "Polymerase Chain Reaction"[Mesh]            | 446,802   |
| #15 | #11 OR #12 OR #13 OR #14                     | 484,920   |
| #16 | #4 AND #15                                   | 2,253     |
| #17 | animals[mh] NOT (animals[mh] AND humans[mh]) | 4,704,796 |
| #18 | #16 NOT #17                                  | 2,152     |

Search by CENTRAL performed on June 3<sup>rd</sup>, 2020

|     | Search terms                   | Number |
|-----|--------------------------------|--------|
| #1  | [mh "pneumococcal infections"] | 188    |
| #2  | [mh "Pneumonia, Pneumococcal"] | 163    |
| #3  | streptococcus pneumonia*:ti,ab | 1382   |
| #4  | penumococcal:ti,ab             | 3      |
| #5  | #1 OR #2 OR #3 OR #4           | 1557   |
| #6  | [mh Antigens]                  | 14056  |
| #7  | antigen*:ti,ab                 | 16332  |
| #8  | #6 OR #7                       | 26376  |
| #9  | [mh Urine]                     | 639    |
| #10 | urin*:ti,ab                    | 58834  |

|     |                                                 |       |
|-----|-------------------------------------------------|-------|
| #11 | #9 OR #10                                       | 58991 |
| #12 | #8 AND #11                                      | 1382  |
| #13 | #5 AND #12                                      | 27    |
| #14 | [mh animals] NOT ([mh animals] AND [mh humans]) | 6797  |
| #15 | #13 NOT #14                                     | 27    |
