# Supplementary material for: Diagnostic accuracy of urinary antigen tests for pneumococcal pneumonia among patients with acute respiratory failure suspected pneumonia: a systematic review and meta-analysis
Source: HighWire-hosted journal article supplement (doi:10.1136/bmjopen-2021-057216), 2022-08-01
Supplement: bmjopen-2021-057216supp003_data_supplement.pdf [file bmjopen-2021-057216supp003_data_supplement.pdf]

**Supplementary file 2.** Prevalence of TP, TN, FN, FP patients by physical examination in 1,000 patients

| <b>Diagnostic accuracy parameter</b> | <b>Prevalence (n, 95% CI)</b> |               |               |
|--------------------------------------|-------------------------------|---------------|---------------|
|                                      | <b>5%</b>                     | <b>10%</b>    | <b>15%</b>    |
| TP                                   | 33 (31–34)                    | 66 (62–69)    | 99 (93–104)   |
| FN                                   | 17 (16–19)                    | 34 (31–38)    | 51 (46–57)    |
| TN                                   | 855 (808–884)                 | 810 (765–837) | 765 (722–791) |
| FP                                   | 95 (66–142)                   | 90 (63–135)   | 85 (59–128)   |

Abbreviations: TP, true positive; FP, false positive; TN, true negative; FN, false negative.
